# Supplementary material for: RETRACTED: Berberine Inhibited Growth and Migration of Human Colon Cancer Cell Lines by Increasing Phosphatase and Tensin and Inhibiting Aquaporins 1, 3 and 5 Expressions
Source: MDPI journal article supplement (doi:10.3390/molecules28093823), 2023-04-29
Supplement: s1 [file s1]

Archive with 1 entries (1 files):
- molecules-2338509-supplementary.pdf
